# Supplementary material for: The fluorescence of ion pairs of the fluorenyl carbanion
Source: Royal Society of Chemistry journal article supplement (doi:10.1039/b103730g), 2001-01-01
Supplement: additional_text.doc [file additional_text.doc]

**3. Results**

**
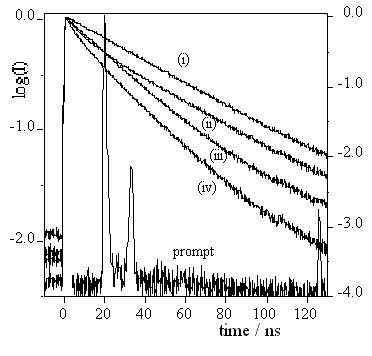
**

Figure S1 Typical decay data: dependence on temperature and excitation wavelength for Fl-Li+ in MTHF: (i) 0.4 oC, 370 nm; (ii) 0.4 oC, 350 nm; (iii) 21 oC, 370 nm, (iv) 21 oC, 350 nm. Prompt (right scale) displaced for clarity.

Supplementary Fig. S1 shows typical bi-exponential fluorescence decays.

Fluorenyl lithium in 2,5-dimethyltetrahydrofuran.

This system is described in detail in the main text.

Although linear van’t Hoff plots were obtained assuming a simple equilibrium between tight and loose ion pairs, the possibility of the participation of aggregated species needed to be considered. For example, the emission and excitation spectra of fluorenyl lithium in dioxan have been shown to be strongly concentration dependent as a result of aggregation of the tight ion pairs 24. Although the permittivity of DMTHF ( = 7.52) is considerably greater than that of dioxan ( = 2.21), permittivity alone is an unreliable guide to the solvation state: the ability to donate electrons to the cation is usually more important. There seems to be no suggestion that such aggregation occurs in tetrahydropyran ( = 5.61)18. However, this solvent is a much stronger solvating agent than DMTHF because there is less steric hindrance to coordination. To explore the possible involvement of aggregation, a solution of Fl-Li+ in DMTHF was prepared in a vessel fitted with cells having 1 cm and 10.5 cm pathlengths which permitted the determination of the absorption spectrum over about a 100-fold range of concentration down to about 7x10-7 molar. No change in the absorption bands could be detected: this implies that aggregation does not occur.

Fluorenyl lithium in MTHF

The shape of the emission spectrum varied with excitation wavelength. Light of 370 nm wavelength, which selectively excites the loose ion pair, gave rise to two distinct emission maxima at 529 and 573 nm separated by a well defined minimum. In contrast, although excitation at 343 nm also resulted in peaks at the same wavelengths, the minimum between them was shallow and unsymmetrical and the spectrum clearly represented emission from both kinds of ion pair. This was confirmed by excitation spectra run at 20 oC which showed maxima at 345 and 370 nm but with the intensity at the former wavelength being greater when the detector was set at 560 nm rather than at 539 nm. When the temperature was lowered, the depth of the minimum in the emission spectrum excited at 343 nm was sharply increased and below about -10 oC the spectrum closely resembled that of the loose ion pair of Fl-Li+ in DMTHF. Time-resolved excitation spectra (Fig. 8) determined at 0.4 oC showed that the fluorescence lifetime of the loose ion pair is much greater than that of the tight.

Fluorescence lifetimes were determined for two different samples of Fl-Li+ in MTHF, each over a range of temperature. The two data sets show very similar dependences of lifetime upon temperature but with one set consistently slightly higher than the other. The concentration of this particular solution was not measured but was known to be more dilute than any other solution studied in the present work, which must have resulted in the presence of some free anion; the corollary is that the mole fraction of the tight ion pair is correspondingly lowered. The spectral characteristics of the free anion are indistinguishable from those of the loose ion pair and render selective excitation impossible but it would seem that the lifetime of the free anion may be somewhat longer than that of the loose ion pair.

Excitation at either 346 or 370 nm gave emissions with intensities and lifetimes that appeared to increase rapidly from room temperature to about -50 oC and more slowly thereafter.

Fluorenyl lithium in THF

At room temperature the proportion of loose ion pairs is of the order of 60%. The emission spectrum has maxima at 529 and 573 nm and its appearance was independent of whether excitation was at 350, 375 or in the range from 420 to 490 nm. This implies that a single emitter predominates. The excitation spectrum showed the expected maxima at 349 and 373 nm corresponding respectively to the tight and loose ion pairs but the relative intensity of the loose pair was markedly greater than seen in the absorption spectrum at the same (room) temperature.

Fluorenyl sodium in THF and in MTHF

At 20 oC the emission spectrum of Fl-Na+ in THF, excited at 374 nm, had maxima at 532 and 575 nm. Exciting at 356 nm gave emission maxima at somewhat longer wavelengths - 535 and 578 nm - showing the presence of more than a single emitter. Cooling caused a gradual blue shift of the emission spectra excited at both wavelengths until by about -40 oC they became indistinguishable reaching 528 and 572 nm. The excitation maxima at 20 oC were found to be at 354, 456, 487 nm with (uncorrected) relative intensities closely matching the absorption spectrum.

The excitation spectrum of Fl-Na+ in MTHF was dependent upon the choice of emission wavelength below about -60 oC. With the detector set at 540 nm there was a strong peak at 356 nm with a small shoulder at 374 nm. Setting the detector at 525 nm - near the short wavelength edge of the emission - gave, in contrast, a strong peak at 374 nm with a barely detectable shoulder at 356 nm. Similar selectivity was clearly observable down to -115o showing the tight and loose ion pairs emit separately.

Potassium fluorenyl in THF and in MTHF

At room temperature the emission maxima in MTHF were found to be at 539 and 581 nm but there was a progressive blue shift to 524 and 567 nm and an increase in the relative intensity of the band at shorter wavelength on cooling to -150 oC - reflecting overlapping emissions from tight and loose ion pairs. The excitation spectra were in qualitative accord with expectation showing only a peak at 363 nm until below -90 oC when a significant shoulder appeared at 373 nm. At -135 oC there was a very strong peak at 374 nm with only a shoulder at 363 nm but heavy overlap prevented quantitative comparison with the intensities of the corresponding bands in the absorption spectrum.

**4. Discussion**

Ground state equilibria

A rough test of the credibility of the data is to calculate the temperature at which the equilibrium constant is unity and see if the appearance of the visible absorption spectrum agrees. This test is clearly failed only by the nmr result for Fl-Li+/MTHF where the calculated and observed temperatures are +20 and -25 oC respectively. The limitation of such a test is that fitting errors in Ho and So tend to self-compensate to generate values for the temperature where K ~ 1. The system showing the greatest inconsistency is Fl-Li+/ DMTHF. The thermodynamic parameters reported by Smid 14 are anomalously small by comparison with all other entries in the Table. On this same basis, those determined in the present work for the same system are rather high; however, consistent results were obtained at three wavelengths (314, 370 and 516 nm). Interestingly, Hogen-Esch reported Ho = - 42 kJ mol-1 and So = - 209

J mol-1K-1 for the closely related system 2-hexylfluorenyl lithium in DMTHF.
